1 **Interleukin-4 restores neurogenic plasticity of the primary human neural**  
2 **stem cells through suppression of Kynurenic acid production upon**  
3 **Amyloid-beta42 toxicity**

4

5 Christos Papadimitriou<sup>1,2</sup>, Hilal Celikkaya<sup>1,2</sup>, Mehmet Ilyas Cosacak<sup>1,2</sup>, Violeta  
6 Mashkaryan<sup>1,2</sup>, Prabesh Bhattarai<sup>1,2</sup>, Weilin Lin<sup>3</sup>, Alvin Kuriakose Thomas<sup>3</sup>,  
7 Yixin Zhang<sup>3</sup>, Uwe Freudenberg<sup>2,4</sup>, Carsten Werner<sup>2,4</sup>, Caghan Kizil<sup>1,2,\*</sup>

8

9 <sup>1</sup> German Center for Neurodegenerative Diseases (DZNE) Dresden,  
10 Helmholtz Association, Arnoldstr. 18, 01307, Dresden, Germany.

11 <sup>2</sup> Center for Regenerative Therapies (CRTD), TU Dresden, Fetscherstr. 105,  
12 01307, Dresden, Germany.

13 <sup>3</sup> B CUBE, Center for Molecular Bioengineering, TU Dresden, Arnoldstr. 18,  
14 10307, Dresden, Germany.

15 <sup>4</sup> Leibniz Institute of Polymer Research Dresden, Max Bergmann Center of  
16 Biomaterials Dresden, Hohe Str. 6, 01069, Dresden, Germany.

17

18 \*Correspondence should be addressed to: C.K. ([caghan.kizil@dzne.de](mailto:caghan.kizil@dzne.de))

19

20

21 **Abstract**

22 The immune response is an important determinant of the plasticity and  
23 neurogenic capacity of neural stem cells (NSCs) upon amyloid-beta42 (A $\beta$ 42)  
24 toxicity in Alzheimer's disease (AD). However, the direct effects of individual  
25 immuno-modulatory effectors on NSC plasticity remain to be elucidated and  
26 are the motivation for reductionist tissue-mimetic culture experiments. Using  
27 starPEG-Heparin hydrogel system that provides a defined 3D cell-instructive  
28 neuro-microenvironment culture system, sustains high levels of proliferative  
29 and neurogenic activity of human NSCs, and recapitulates the fundamental  
30 pathological consequences of Amyloid toxicity upon A $\beta$ 42 administration, we  
31 found that the anti-inflammatory cytokine interleukin-4 (IL4) restores the  
32 plasticity and neurogenic capacity of NSCs by suppressing the A $\beta$ 42-induced  
33 kynurenic acid-producing enzyme kynurenine aminotransferase 2 (KAT2),  
34 which we also found to be upregulated in the brains of the AD model,  
35 APP/PS1dE9 mouse. Our transcriptome analyses showed that IL4 treatment  
36 restores the expression levels of NSC and cortical subtype markers. Thus, our  
37 dissective neuro-microenvironment culture revealed IL4-mediated  
38 neuroinflammatory crosstalk for human NSC plasticity and predicted a new  
39 mechanistic target for therapeutic intervention in AD.

40

41 **Keywords:**

42 Human neural stem/progenitor cell, plasticity, Amyloid-beta42, Interleukin-4,  
43 KAT2, Kynurenic acid, Alzheimer's disease

44

45

46

47

48

49

50

## 51 **Introduction**

52 The neurogenic capacity of the brain relies on the endogenous reservoir or  
53 transplanted population of neural stem cells (NSCs) that could be harnessed  
54 for neuronal repair during neurodegenerative diseases (Gage and Temple,  
55 2013; Wyss-Coray, 2016). Therefore, it is fundamentally important to  
56 understand how NSCs can be made to contribute to neuronal regeneration  
57 and how they are affected by disease conditions.

58 Amyloid-beta42 (A $\beta$ 42) deposition and neurofibrillary tangles constitute the  
59 hallmark pathologies in Alzheimer's disease (AD) (Bertram et al., 2010; Haass  
60 and Selkoe, 2007), which is the most prevalent neurodegenerative disease. In  
61 addition to neuronal survival and synaptic transmission, A $\beta$ 42 impairs NSC  
62 proliferation (He et al., 2013; Taupin, 2009; Tincer et al., 2016). Therefore, the  
63 human brain undergoes neurodegeneration and at the same time cannot  
64 replenish the lost neurons upon A $\beta$ 42 due to hampered NSC proliferation and  
65 neurogenesis. These combinatorial effects exacerbate the manifestation of  
66 the disease (Heneka et al., 2015; Nalbantoglu et al., 1997; Selkoe, 2002).  
67 Although pathogenic effects of A $\beta$ 42 in neurons are well-studied (Selkoe,  
68 2002), little is known about how A $\beta$ 42 impinges on NSC proliferation and  
69 neurogenic capacity and how we can circumvent this reduction.

70 Animal models of AD suggest a multifaceted immuno-modulatory regulation of  
71 NSCs (Glass et al., 2010; Heneka et al., 2015; Kizil et al., 2015b; Kyritsis et  
72 al., 2012; Wyss-Coray, 2006). In general, pro-inflammatory signaling is  
73 believed to impair stem cell plasticity, while anti-inflammatory cytokines  
74 restore the homeostatic neurogenic ability in NSCs (Kizil et al., 2015b; Kokaia  
75 et al., 2012; Kyritsis et al., 2014; Schwartz et al., 2013). These effects of anti-  
76 inflammatory cytokines are thought to be taking place through the regulation  
77 of macrophages and resolution of the pro-inflammatory signaling, which is  
78 detrimental to stem cell plasticity (Carpentier and Palmer, 2009; Heneka et al.,  
79 2015; Wyss-Coray, 2006). However, since NSCs also recruit immune-related  
80 pathways, they could be directly responsive to the immune-milieu (Carpentier

81 and Palmer, 2009), yet the direct effects of anti-inflammatory cytokines on  
82 NSC plasticity in AD is not well-studied because of the presence of multiple  
83 cell types, and the pleiotropy of individual factors that hinder the analyses of  
84 direct crosstalk mechanisms (Schwartz et al., 2013; Tincer et al., 2016). For  
85 instance, Interleukin-4 (IL4) was shown to be an anti-inflammatory signal by  
86 ameliorating or exacerbating the amyloid-load and neuropathology in a  
87 context-dependent manner in mammals, and little is known about its direct  
88 effect on NSCs (Chakrabarty et al., 2012; Kiyota et al., 2010; Park et al.,  
89 2008). Recently, we have shown that IL4 establishes neuro-immune crosstalk  
90 between the site of pathology and NSCs, and directly regulates stem cell  
91 proliferation in an adult zebrafish AD model (Bhattarai et al., 2016). Therefore,  
92 investigating whether anti-inflammatory cytokine IL4 may have a similar  
93 mechanism of action in mammalian AD models and identifying the  
94 downstream regulation of immune system in NSCs would be instrumental in  
95 elaborating on the neuro-immune regulation of NSC plasticity. However,  
96 mouse models may not recapitulate the whole spectrum of the AD (LaFerla  
97 and Green, 2012) and the specific molecular programs in human cells differ  
98 from mouse cells (Qiu et al., 2016). Additionally, conventional 2D cultures are  
99 not representative of in vivo environments (Ravi et al., 2015) and emerging 3D  
100 culture technologies, such as organoids, are often highly complex. Therefore,  
101 alternative in vitro systems utilizing human cells to model neural development  
102 or neurodegeneration in a thoroughly defined and tunable in vivo-like 3D  
103 environment would be highly beneficial. The widely used Matrigel<sup>TM</sup>-based 3D  
104 cultures are of ill-defined composition, cannot be adjusted for various  
105 important cell-instructive parameters (Ravi et al., 2015) and are therefore not  
106 suitable for elucidating the influences of different exogenous and paracrine  
107 signals on cellular development (Choi et al., 2014; Fatehullah et al., 2016;  
108 Tang-Schomer et al., 2014; Zhang et al., 2014), which, in turn, limits their  
109 applicability for the investigation of the plasticity and neurogenic capacity of  
110 NSPCs. Therefore, reductionist, humanized assays of NSC plasticity and  
111 neurogenesis could be instrumental for elucidating the role of individual  
112 cytokines in vitro.



113

## 114 **Results**

115 In this study, we utilized a modular platform of minimalist GAG-based  
116 hydrogels to generate defined tissue-mimetic neuro-microenvironments for  
117 testing the plasticity of NSCs and the network formation of neurons as well as  
118 the molecular aspects of neurodegenerative diseases. The choice of  
119 compositionally and biophysically defined GAG-containing materials that are  
120 known to enable the tissue-analogous presentation of molecular  
121 immunomodulators including IL4 (Lohmann et al., 2017; Schirmer et al., 2016)  
122 adds valuable new options to those of previously reported 3D culture models  
123 (Choi et al., 2014; Zhang et al., 2014).

124 The anti-inflammatory cytokine interleukin-4 (IL4) has previously been  
125 implicated in regulating NSC proliferation in rodent models indirectly by  
126 converting macrophages into a post-inflammatory state, implying a negative  
127 role for inflammation on stem cell plasticity (Griffin, 2013). Conversely, we  
128 have recently reported direct effects of IL4 on NSCs in an adult zebrafish  
129 brain model of AD, suggesting a positive role for pro-inflammatory cues in  
130 regeneration (Bhattarai et al., 2016). For humans, however, the direct role of  
131 IL4 on NSC plasticity and neurogenic capacity is still unknown. To address  
132 this question, we used the biohybrid starPEG-GAG hydrogel-based NSC  
133 cultures that are particularly well-suited to our question since the materials  
134 were previously shown to reversibly bind and protect IL4 in ways resembling  
135 its complexation in extracellular matrices (Schirmer et al., 2016), resulting in  
136 the effective modulation of the activity of anti-inflammatory cytokines  
137 (Freudenberg et al., 2016). To determine the effects of IL4 on our 3D NSC  
138 cultures in normal and AD conditions, we first analyzed the expression of  
139 interleukin-4 receptor (IL4R) and found that IL4R is expressed in GFAP-  
140 positive NSCs from the beginning of the culture and can lead to  
141 phosphorylation of STAT6 after IL4 treatment (Figure 1A-B'), confirming  
142 functional intracellular signaling. To determine whether IL4 treatment affects  
143 the normal development and composition of the human NSC cultures, we

144 compared the control and IL4-treated cultures (Figure 1C-H). We observed  
145 that IL4 does not affect the total number and composition of NSCs and  
146 neurons in the gels (Figure 1I), indicating that IL4 does not alter the plasticity  
147 and neurogenic capacity of NSCs in neurodevelopmental process in 3D gels.

148 Previously, we have shown that in 3D gel cultures, primary human NSC  
149 plasticity, neurogenic ability, and neuronal network forming capacity are  
150 reduced by A $\beta$ 42 (Papadimitriou et al., 2017), and IL4 has a positive effect on  
151 NSC proliferation in an A $\beta$ 42-based Alzheimer's model of adult zebrafish brain  
152 (Bhattarai et al., 2016). Therefore, to determine whether IL4 treatment would  
153 have an effect on the reduction of NSC plasticity, neurogenic properties and  
154 network formation of the neurons, we cultured A $\beta$ 42-treated cells in the  
155 presence of hydrogel-administered IL4, and compared it to control and A $\beta$ 42-  
156 treated cells without IL4 (Figure 2A-F). Compared to control gels, A $\beta$ 42  
157 conditioning significantly reduced NSCs (GFAP/SOX2) and early neurons  
158 (NEUROD/DCX), while IL4 rescued this reduction (Figure 2G). Quantifying the  
159 activated (GFAP+/SOX2+) fraction of NSCs (GFAP and/or SOX2-positive  
160 cells), we found that IL4 significantly increased the percentage of activated  
161 NSCs (Figure 2H), which manifests itself in the formation of more DCX-  
162 positive neurons and networks (Figure 2I-I"). To validate the positive effect of  
163 IL4 on activation of proliferation of NSCs and neurogenesis, we determined  
164 the levels of newborn cells at 3 weeks of 3D cultures after a 6-hour BrdU  
165 treatment during the first week (Figure 2J-L). We found that A $\beta$ 42  
166 administration reduced the total number of newborn cells (~96.1%) and BrdU+  
167 glia significantly (~86.5%), while IL4 treatment rescued these reductions and  
168 enhanced the ratio of newborn cells to the BrdU-positive GFAP cells (as an  
169 indicator of neurogenic capacity) (Figure 2M). These results indicate that  
170 A $\beta$ 42 impairs NSC plasticity, neurogenic capacity and network-formation  
171 ability of human NSCs and neurons while IL4 restores these features despite  
172 the prevalent AD environment (Figure 2N). We found that the rescue effect of  
173 IL4 is specific because knocking-down IL4 activity using a neutralizing  
174 antibody significantly reduced the rescue effect (Supplementary Figure 1).  
175 Overall, these results suggest that our starPEG-heparin 3D hydrogel cultures

176 of human NSCs can recapitulate the tissue-mimetic manifestation of  
177 neurogenic capacity and plasticity and can be used to investigate the direct  
178 effects of particular immune-related factors in a highly reductionist manner.

179 Since our 3D cultures can be used to investigate the direct effects of IL4 on  
180 NSCs, we also aimed to analyze the downstream regulation exerted by IL4.  
181 We previously found that IL4 increases stem cell proliferation in the adult  
182 zebrafish brain after A $\beta$ 42 administration (Bhattarai et al., 2016). Whole  
183 genome transcriptome analysis of this model revealed differentially expressed  
184 and enriched components of the tryptophan metabolism pathway that  
185 ultimately generated kynurenic acid (KYNA) (Bhattarai et al., 2016). While  
186 KYNA was reported to be a neuroprotective molecule (Schwarcz et al., 2012;  
187 Szalardy et al., 2012; Zwilling et al., 2011), its direct effect on NSCs is  
188 unknown (Jones et al., 2013). We hypothesized that the effects of IL4 on  
189 A $\beta$ 42-mediated impairment of NSC plasticity and neurogenic capacity would  
190 regulate KYNA production.

191 To test this hypothesis, we compared the expression of the enzymes  
192 producing KYNA, which is produced from tryptophan by a cascade of  
193 enzymatic reactions involving three main enzymes: IDO1, TDO2 and KAT2  
194 (Figure 4A-D, Supplementary Figure 2). We found that the percentage of cells  
195 expressing IDO1 and TDO2 remained constant after A $\beta$ 42 or IL4 treatment  
196 (Supplementary Figure 2G). However, A $\beta$ 42 increased the levels of KAT2  
197 (Figure 3E), which is expressed in glial cells as described previously  
198 (Schwarcz et al., 2012). IL4 restored the original percentage of cells  
199 expressing this enzyme (Figure 3E), suggesting that the toxic effect of A $\beta$ 42  
200 on NSCs is, in part, mediated by the upregulation of KAT2 and the production  
201 of KYNA. Therefore, we hypothesized that an effective concentration of  
202 produced in cultures should correlate with A $\beta$ 42 toxicity, and IL4 treatment  
203 could reduce these levels. To test this hypothesis, we performed mass  
204 spectrometry coupled with liquid chromatography for detecting the levels of  
205 KYNA in cell culture medium from control, IL4-treated, A $\beta$ 42-treated, and  
206 A $\beta$ 42 + IL4-treated gels during their last week of culture (Supplementary  
207 Figure 3). We found that the amount of KYNA produced by GFAP cells was

208 significantly increased after A $\beta$ 42 treatment, and IL4 reduces this level down  
209 to control levels (Figure 3E', Supplementary Figure 3D). These results  
210 indicate that KYNA mediates A $\beta$ 42 toxicity in human NSCs, and IL4 reduces  
211 effective KYNA levels to physiological levels.

212 To investigate how KYNA affects NSCs in 3D cultures and whether this effect  
213 is similar to that of A $\beta$ 42 treatment, we performed immunocytochemical  
214 staining for GFAP and SOX2 on control, A $\beta$ 42-treated, and KYNA-treated  
215 NSPC cultures (Figure 3F-H). We found that KYNA reduced the total number  
216 of GFAP+, SOX2+ and GFAP/SOX2 double-positive cells similar to A $\beta$ 42  
217 (Supplementary Figure 4A) and reduced the percentage of activated NSCs  
218 (GFAP+/SOX2+) (Figure 3I, Supplementary Figure 4A). Furthermore,  
219 compared to control cultures, KYNA diminished the proliferative capacity of  
220 NSCs (Figure 3J-L, Supplementary Figure 4B-D). This result shows that  
221 KYNA is an intermediate conveying the A $\beta$ 42-induced impairment of the  
222 proliferative capacity of NSCs.

223 Since IL4 reduces the production of KYNA by suppressing the expression of  
224 KAT2, we hypothesized that blocking the KAT2 activity would mimic the  
225 effects of IL4 on NSC plasticity. Therefore, we inhibited KAT2 with the  
226 selective antagonist BFF12, and found that the reduction in GFAP+ and  
227 SOX2+ cells by A $\beta$ 42 is counteracted by BFF12 treatment similar to IL4  
228 (Figure 4A-C). Thus, the restorative effect of KAT2 inhibition by BFF12 on the  
229 diminished NSCs (GFAP/SOX2) is comparable to IL4-treatment (Figure 4D),  
230 confirming that kynurenic acid production is one reason for A $\beta$ 42 toxicity in  
231 NSCs. Overall, we showed that A $\beta$ 42 reduces human NSC proliferation and  
232 neurogenic capacity in dissective AD model conditions in GAG-based  
233 hydrogels through upregulation of KAT2 and subsequent increases in  
234 kynurenic acid, which can be prevented by IL4 through the inhibition of KAT2  
235 (Figure 4E).

236 Based on our findings, we hypothesized that if IL4 can restore the plasticity  
237 and neurogenic output of human NSCs in A $\beta$ 42 toxicity conditions mediated  
238 by KYNA, the expression of NSC makers and cortical markers should change

239 similarly in A $\beta$ 42 and KYNA-treated gels, and IL4 treatment should restore  
240 those expression levels. Therefore, we performed whole transcriptome  
241 sequencing on gels treated with A $\beta$ 42, KYNA, and A $\beta$ 42 with IL4. We found  
242 that in A $\beta$ 42- or KYNA-treated gels, there is an overall reduction in NSC  
243 marker expression (Figure 4F, upper and middle rows), while IL4 treatment  
244 with A $\beta$ 42 abrogates this reduction and in some cases even enhances the  
245 expression levels of NSC markers (Figure 4F, lower row). Since NSC marker  
246 expression levels are restored by IL4 treatment after A $\beta$ 42, we hypothesized  
247 that this change in NSCs might be reflected in the replenishment of cortical  
248 subtypes. Therefore, we analyzed a set of cortical subtype markers (Figure  
249 4G) and observed that similar to NSC markers, A $\beta$ 42 and KYNA treatments  
250 reduce the cortical marker expression in general (upper and middle row,  
251 Figure 4G), while IL4 restores or enhances the expression levels of cortical  
252 neuronal markers (Figure 4G, lower row). These results suggest that IL4  
253 restores the neurogenic ability of NSCs and neuronal network formation after  
254 A $\beta$ 42 toxicity through restoring the molecular programs that underlie the NSC  
255 plasticity and neurogenic output.

256 KAT2 is expressed in a subset of astrocytes in the cerebral cortex and  
257 hippocampus of rat brains (Guidetti et al., 2007); however, its regulation by  
258 A $\beta$ 42 conditions and pathology is unknown. Therefore, to test whether the  
259 findings in our GAG-based hydrogel system would be biologically relevant to  
260 the in vivo situation, we analyzed the expression of KAT2 in controls and  
261 APP/PS1dE9 model of AD mouse brains (Figure 4F-I). Compared to cortical  
262 and hippocampal regions of control animals where KAT2 is detected rather  
263 weakly in very few cells (Figure 4H, J), AD mouse brains strongly upregulated  
264 KAT2 levels in GFAP-positive glia in the cortex and the hippocampus (Figure  
265 4I, K). These results support our findings that A $\beta$ 42 toxicity in NSCs is  
266 mediated by kynurenic acid through upregulation of KAT2, and indicates that  
267 our 3D culture system can be used as a predictive tool for in vivo conditions.

268

## 269 **Discussion**

270 KYNA was previously shown to have a neuroprotective role in  
271 neurodegenerative diseases (Klein et al., 2013; Schwarcz et al., 2012; Stone  
272 and Darlington, 2002; Szalardy et al., 2012; Zwilling et al., 2011), but its role  
273 in NSCs was not clear. Here, we demonstrated that KYNA negatively affects  
274 human NSC plasticity in a dissective, tissue-mimetic 3D culture system. This  
275 finding is important because clinical efforts for enhancing KYNA levels might  
276 be effective for neuronal survival but could impair NSC activity that is required  
277 to replenish the lost neurons. Our data imply that a temporal control of KYNA  
278 production could be beneficial by initially enhancing NSC proliferation and  
279 later sustaining neuroprotection. Furthermore, we showed that IL4 has, in  
280 addition to its documented neuromodulatory role, a direct effect on human  
281 NSCs by a previously unknown involvement in KAT2 expression and KYNA  
282 production. Additionally, these results suggest that our 3D culture system can  
283 be used to pinpoint previously unidentified roles of highly studied molecules  
284 during neurodegenerative diseases. For instance, IL4 is an anti-inflammatory  
285 factor, and its expression is contingent upon advanced AD pathology, when  
286 amyloid load and plaques already exist (Heneka et al., 2015; Schwartz et al.,  
287 2013). Previously, the beneficial effects of IL4 on neuronal survival and NSC  
288 activity were associated with the reduced inflammatory milieu (Kiyota et al.,  
289 2010). However, our dissective GAG-based hydrogel 3D cultures are devoid  
290 of an immune system. Therefore, our data indicated that IL4 establishes direct  
291 crosstalk between the immune system and the NSC compartment, governing  
292 plasticity and the neurogenic capacity of stem cells. This finding not only  
293 confirms the previous *in vivo* results in zebrafish (Bhattarai et al., 2016) but  
294 also provides validation for the use of GAG-based hydrogel culture as an  
295 experimentally reliable and reductionist surrogate for *in vivo* studies. Our 3D  
296 cultures can also open up new avenues for tweaking the neuroinflammatory  
297 microenvironment toward therapeutically relevant mobilization schemes of  
298 endogenous NSCs.

299 Our newly established methodology of GAG-based hydrogel NSC cultures  
300 was key to the reported analyses of the effects of IL4 and KYNA since this



301 reductionist 3D neuro-microenvironment system concomitantly supported  
302 NSC plasticity and neurogenic potential. As shown for the specific reported  
303 case, our tissue-mimetic reductionist culture system is highly advantageous  
304 for elucidating the effects of individual immunomodulators on NSCs, for  
305 recapitulating complex micromilieu, and for biologically investigating the  
306 downstream effects of a particular signaling pathway. In particular, the GAG-  
307 based hydrogel-culture approach is similarly suitable for investigating the  
308 cellular interactions of neuroglia with macrophages, i.e., elucidating the  
309 interplay between cellular components of the immune system and NSCs in AD  
310 mimicking conditions. The GAG-based hydrogel culture system also has the  
311 potential to facilitate high-throughput screening of biologically active  
312 compounds for their effects on NSC plasticity and specific neuro-immune  
313 communication.

314 **Author contributions:** C.P. and C.K. conceived and designed the  
315 experiments. L.B., U.F., and C.W. provided the gel materials, C.P. performed  
316 cell cultures, imaging and quantifications. P.B., M.I.C., H.H., H.C. and V.M  
317 helped the cell cultures. Y.Z. provided the Amyloid peptide, W.L. performed  
318 LC-MS/MS. C.K. wrote the manuscript, C.K. and C.W. revised the manuscript.

### 319 **Acknowledgements**

320 This work was supported by DZNE and Helmholtz Association (VH-NG-1021,  
321 C.K.), DFG (KI1524/6, C.K.), (AN797/4-1, C.L.A.) and (CRC TR 67, CRC SFB  
322 655, FOR/EXC999, C.W.); and BMBF (PRECIMATRIX-FKZ-03XP0083–  
323 310117, C.W.).

324

### 325 **References**

- 326 Bertram, L., Lill, C.M., and Tanzi, R.E. (2010). The genetics of Alzheimer disease:  
327 back to the future. *Neuron* *68*, 270-281.
- 328 Bhattarai, P., Thomas, A.K., Cosacak, M.I., Papadimitriou, C., Mashkaryan, V.,  
329 Zhang, Y., and Kizil, C. (2017). Modeling Amyloid- $\beta$ 42 Toxicity and  
330 Neurodegeneration in Adult Zebrafish Brain. *Journal of Visualized Experiments* *128*.
- 331 Bhattarai, P., Thomas, A.K., Papadimitriou, C., Cosacak, M.I., Mashkaryan, V., Froc,  
332 C., Kurth, T., Dahl, A., Zhang, Y., and Kizil, C. (2016). IL4/STAT6 signaling  
333 activates neural stem cell proliferation and neurogenesis upon Amyloid- $\beta$ 42  
334 aggregation in adult zebrafish brain. *Cell Reports* *17*, 941–948.

- 335 Carpentier, P.A., and Palmer, T.D. (2009). Immune influence on adult neural stem  
336 cell regulation and function. *Neuron* 64, 79-92.
- 337 Chakrabarty, P., Tianbai, L., Herring, A., Ceballos-Diaz, C., Das, P., and Golde, T.E.  
338 (2012). Hippocampal expression of murine IL-4 results in exacerbation of amyloid  
339 deposition. *Mol Neurodegener* 7, 36.
- 340 Choi, S.H., Kim, Y.H., Hebisch, M., Sliwinski, C., Lee, S., D'Avanzo, C., Chen, H.,  
341 Hooli, B., Asselin, C., Muffat, J., *et al.* (2014). A three-dimensional human neural cell  
342 culture model of Alzheimer's disease. *Nature* 515, 274-278.
- 343 Fatehullah, A., Tan, S.H., and Barker, N. (2016). Organoids as an in vitro model of  
344 human development and disease. *Nat Cell Biol* 18, 246-254.
- 345 Freudenberg, U., Liang, Y., Kiick, K.L., and Werner, C. (2016). Glycosaminoglycan-  
346 Based Biohybrid Hydrogels: A Sweet and Smart Choice for Multifunctional  
347 Biomaterials. *Adv Mater* 28, 8861-8891.
- 348 Gage, F.H., and Temple, S. (2013). Neural stem cells: generating and regenerating the  
349 brain. *Neuron* 80, 588-601.
- 350 Glass, C.K., Saijo, K., Winner, B., Marchetto, M.C., and Gage, F.H. (2010).  
351 Mechanisms underlying inflammation in neurodegeneration. *Cell* 140, 918-934.
- 352 Griffin, W.S.T. (2013). Neuroinflammatory cytokine signaling and Alzheimer's  
353 disease. *N Engl J Med* 368, 770-771.
- 354 Guidetti, P., Hoffman, G.E., Melendez-Ferro, M., Albuquerque, E.X., and Schwarcz,  
355 R. (2007). Astrocytic localization of kynurenine aminotransferase II in the rat brain  
356 visualized by immunocytochemistry. *Glia* 55, 78-92.
- 357 Haass, C., and Selkoe, D.J. (2007). Soluble protein oligomers in neurodegeneration:  
358 lessons from the Alzheimer's amyloid beta-peptide. *Nat Rev Mol Cell Biol* 8, 101-  
359 112.
- 360 He, N., Jin, W.-L., Lok, K.-H., Wang, Y., Yin, M., and Wang, Z.-J. (2013). Amyloid-  
361  $\beta$ (1-42) oligomer accelerates senescence in adult hippocampal neural stem/progenitor  
362 cells via formylpeptide receptor 2. *Cell Death Dis* 4, e924.
- 363 Heneka, M.T., Carson, M.J., El Khoury, J., Landreth, G.E., Brosseron, F., Feinstein,  
364 D.L., Jacobs, A.H., Wyss-Coray, T., Vitorica, J., Ransohoff, R.M., *et al.* (2015).  
365 Neuroinflammation in Alzheimer's disease. *The Lancet Neurology* 14, 388-405.
- 366 Jones, S.P., Guillemin, G.J., and Brew, B.J. (2013). The kynurenine pathway in stem  
367 cell biology. *Int J Tryptophan Res* 6, 57-66.
- 368 Kiyota, T., Okuyama, S., Swan, R.J., Jacobsen, M.T., Gendelman, H.E., and Ikezu, T.  
369 (2010). CNS expression of anti-inflammatory cytokine interleukin-4 attenuates  
370 Alzheimer's disease-like pathogenesis in APP+PS1 bigenic mice. *FASEB J* 24, 3093-  
371 3102.
- 372 Kizil, C., Iltzsch, A., Kuriakose, A., Bhattarai, P., Zhang, Y., and Brand, M. (2015a).  
373 Efficient cargo delivery using a short cell-penetrating peptide in vertebrate brains.  
374 *PLoS One* 10, e0124073.
- 375 Kizil, C., Kyritsis, N., and Brand, M. (2015b). Effects of inflammation on stem cells:  
376 together they strive? *EMBO reports* 16, 416-426.



- 377 Klein, C., Patte-Mensah, C., Taleb, O., Bourguignon, J.J., Schmitt, M., Bihel, F.,  
378 Maitre, M., and Mensah-Nyagan, A.G. (2013). The neuroprotector kynurenic acid  
379 increases neuronal cell survival through neprilysin induction. *Neuropharmacology* *70*,  
380 254-260.
- 381 Kokaia, Z., Martino, G., Schwartz, M., and Lindvall, O. (2012). Cross-talk between  
382 neural stem cells and immune cells: the key to better brain repair? *Nat Neurosci* *15*,  
383 1078-1087.
- 384 Kyritsis, N., Kizil, C., and Brand, M. (2014). Neuroinflammation and central nervous  
385 system regeneration in vertebrates. *Trends Cell Biol* *24*, 128-135.
- 386 Kyritsis, N., Kizil, C., Zocher, S., Kroehne, V., Kaslin, J., Freudenreich, D., Iltzsche,  
387 A., and Brand, M. (2012). Acute inflammation initiates the regenerative response in  
388 the adult zebrafish brain. *Science* *338*, 1353-1356.
- 389 LaFerla, F.M., and Green, K.N. (2012). Animal models of Alzheimer disease. *Cold*  
390 *Spring Harbor perspectives in medicine* *2*.
- 391 Lohmann, N., Schirmer, L., Atallah, P., Wandel, E., Ferrer, R.A., Werner, C., Simon,  
392 J.C., Franz, S., and Freudenberg, U. (2017). Glycosaminoglycan-based hydrogels  
393 capture inflammatory chemokines and rescue defective wound healing in mice. *Sci*  
394 *Transl Med* *9*.
- 395 Maitz, M.F., Freudenberg, U., Tsurkan, M.V., Fischer, M., Beyrich, T., and Werner,  
396 C. (2013). Bio-responsive polymer hydrogels homeostatically regulate blood  
397 coagulation. *Nat Commun* *4*, 2168.
- 398 Nalbantoglu, J., Tirado-Santiago, G., Lahsaini, A., Poirier, J., Goncalves, O., Verge,  
399 G., Momoli, F., Welner, S.A., Massicotte, G., Julien, J.P., *et al.* (1997). Impaired  
400 learning and LTP in mice expressing the carboxy terminus of the Alzheimer amyloid  
401 precursor protein. *Nature* *387*, 500-505.
- 402 Papadimitriou, C., Cosacak, M.I., Mashkaryan, V., Celikkaya, H., Bray, L., Bhattarai,  
403 P., Hollak, H., Chen, H., He, S., Antos, C.L., *et al.* (2017). Instructive starPEG-  
404 Heparin biohybrid 3D cultures for modeling human neural stem cell plasticity,  
405 neurogenesis, and neurodegeneration. *bioRxiv* 225243.
- 406 Park, K.W., Baik, H.H., and Jin, B.K. (2008). Interleukin-4-induced oxidative stress  
407 via microglial NADPH oxidase contributes to the death of hippocampal neurons in  
408 vivo. *Curr Aging Sci* *1*, 192-201.
- 409 Qiu, J., McQueen, J., Bilican, B., Dando, O., Magnani, D., Punovuori, K., Selvaraj,  
410 B.T., Livesey, M., Hagh, G., Heron, S., *et al.* (2016). Evidence for evolutionary  
411 divergence of activity-dependent gene expression in developing neurons. *Elife* *5*.
- 412 Ravi, M., Paramesh, V., Kaviya, S.R., Anuradha, E., and Solomon, F.D. (2015). 3D  
413 cell culture systems: advantages and applications. *J Cell Physiol* *230*, 16-26.
- 414 Schirmer, L., Atallah, P., Werner, C., and Freudenberg, U. (2016). StarPEG-Heparin  
415 Hydrogels to Protect and Sustainably Deliver IL-4. *Adv Healthc Mater* *5*, 3157-3164.
- 416 Schwarcz, R., Bruno, J.P., Muchowski, P.J., and Wu, H.Q. (2012). Kynurenines in the  
417 mammalian brain: when physiology meets pathology. *Nat Rev Neurosci* *13*, 465-477.
- 418 Schwartz, M., Kipnis, J., Rivest, S., and Prat, A. (2013). How do immune cells  
419 support and shape the brain in health, disease, and aging? *J Neurosci* *33*, 17587-  
420 17596.

- 421 Selkoe, D.J. (2002). Alzheimer's disease is a synaptic failure. *Science* 298, 789-791.
- 422 Stone, T.W., and Darlington, L.G. (2002). Endogenous kynurenes as targets for  
423 drug discovery and development. *Nat Rev Drug Discov* 1, 609-620.
- 424 Szalardy, L., Zadori, D., Toldi, J., Fulop, F., Klivenyi, P., and Vecsei, L. (2012).  
425 Manipulating kynurenic acid levels in the brain - on the edge between neuroprotection  
426 and cognitive dysfunction. *Curr Top Med Chem* 12, 1797-1806.
- 427 Tang-Schomer, M.D., White, J.D., Tien, L.W., Schmitt, L.I., Valentin, T.M.,  
428 Graziano, D.J., Hopkins, A.M., Omenetto, F.G., Haydon, P.G., and Kaplan, D.L.  
429 (2014). Bioengineered functional brain-like cortical tissue. *Proc Natl Acad Sci U S A*  
430 111, 13811-13816.
- 431 Taupin, P. (2009). Adult neurogenesis, neural stem cells and Alzheimer's disease:  
432 developments, limitations, problems and promises. *Curr Alzheimer Res* 6, 461-470.
- 433 Tincer, G., Mashkaryan, V., Bhattarai, P., and Kizil, C. (2016). Neural  
434 stem/progenitor cells in Alzheimer's disease. *Yale J Biol Med* 89, 23-35.
- 435 van Praag, H., Kempermann, G., and Gage, F.H. (1999). Running increases cell  
436 proliferation and neurogenesis in the adult mouse dentate gyrus. *Nat Neurosci* 2, 266-  
437 270.
- 438 Wieduwild, R., Tsurkan, M., Chwalek, K., Murawala, P., Nowak, M., Freudenberg,  
439 U., Neinhuis, C., Werner, C., and Zhang, Y. (2013). Minimal peptide motif for non-  
440 covalent peptide-heparin hydrogels. *J Am Chem Soc* 135, 2919-2922.
- 441 Wyss-Coray, T. (2006). Inflammation in Alzheimer disease: driving force, bystander  
442 or beneficial response? *Nat Med* 12, 1005-1015.
- 443 Wyss-Coray, T. (2016). Ageing, neurodegeneration and brain rejuvenation. *Nature*  
444 539, 180-186.
- 445 Zhang, D., Pekkanen-Mattila, M., Shahsavani, M., Falk, A., Teixeira, A.I., and  
446 Herland, A. (2014). A 3D Alzheimer's disease culture model and the induction of  
447 P21-activated kinase mediated sensing in iPSC derived neurons. *Biomaterials* 35,  
448 1420-1428.
- 449 Zwilling, D., Huang, S.Y., Sathyaikumar, K.V., Notarangelo, F.M., Guidetti, P.,  
450 Wu, H.Q., Lee, J., Truong, J., Andrews-Zwilling, Y., Hsieh, E.W., *et al.* (2011).  
451 Kynurenine 3-monooxygenase inhibition in blood ameliorates neurodegeneration.  
452 *Cell* 145, 863-874.
- 453

454 **Main figure legends**

455

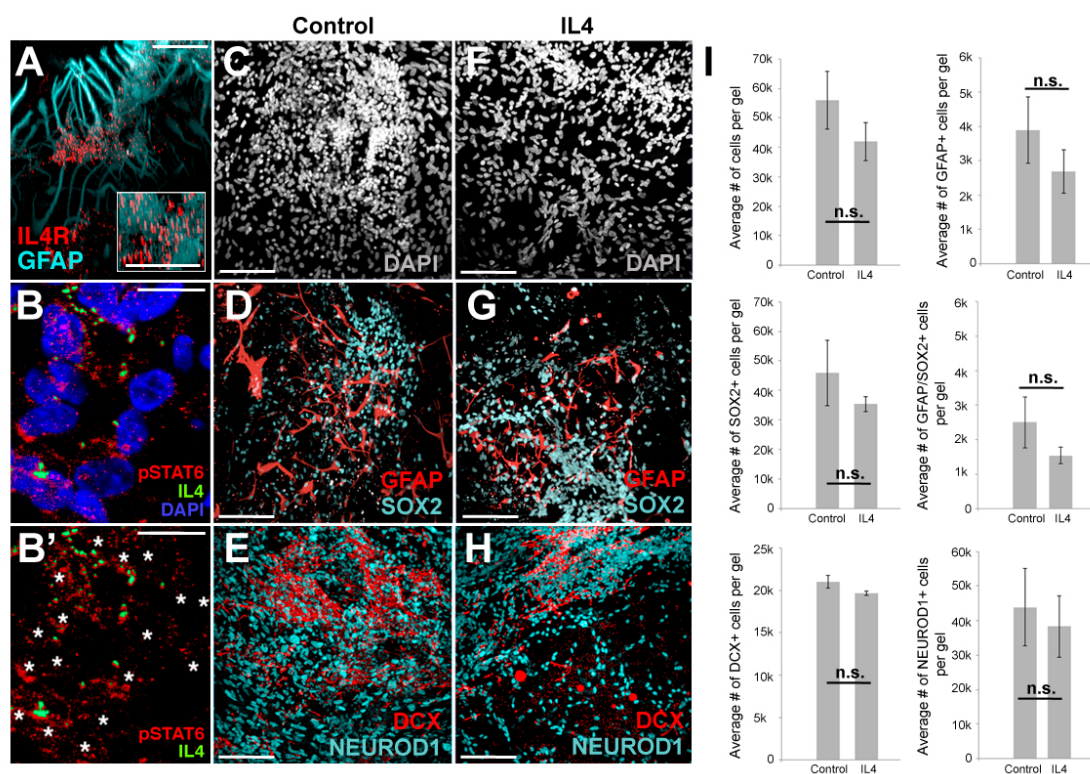

456

457 **Figure 1**

458 Effects of IL4 on 3D cultures of primary human NSCs.

459

460 (A) IL4R in GFAP-positive glia.

461 (B) pSTAT6 and IL4 in control gels.

462 (B') DAPI removed from B. Asterisks: nuclear pSTAT6.

463 (C, F) Nuclei of the cells in control (C) and IL4-treated gels (F) shown in X-  
464 axis.

465 (D, G) GFAP and SOX2 in control (D) and IL4-treated gels (G) shown in X-  
466 axis.

467 (E, H) DCX and NEUROD1 in control (E) and IL4-treated gels (H) shown in X-  
468 axis.

469 (I) Quantification of C-H.

470 Scale bars: 25  $\mu$ m (inset in A, and B), and 100  $\mu$ m elsewhere. All gels are 3  
471 weeks of culture. See also Supplementary Figure 1.

472

473  
474  
475  
476  
477  
478  
479  
480  
481  
482  
483  
484  
485  
486  
487  
488  
489  
490  
491  
492  
493  
494  
495  
496  
497  
498  
499  
500  
501  
502  
503  
504

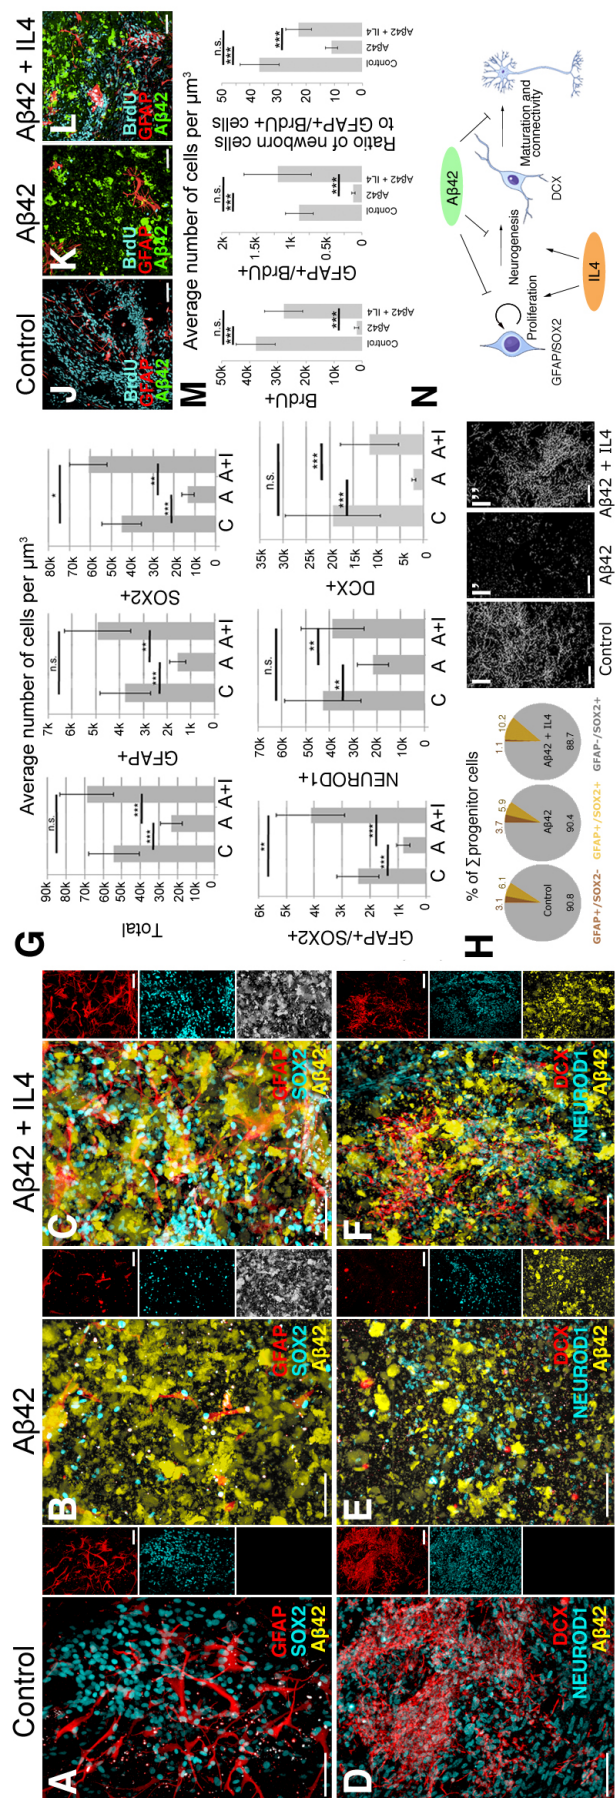



505 **Figure 2**

506 Effects of IL4 on the A $\beta$ 42 toxicity model in 3D cultures.

507

508 (A-C), GFAP, SOX2, A $\beta$ 42 in control (A), A $\beta$ 42 (B) and A $\beta$ 42+IL4 gels (C).

509 (D-F) DCX, NEUROD1, A $\beta$ 42 in control (D), A $\beta$ 42 (F) and A $\beta$ 42+IL4 gels (G).

510 Small panels on the right side of A-F are single fluorescent channels.

511 (G) Quantification graphs.

512 (H) Pie-chart for composition of neural stem/progenitor cells.

513 (I-I'') Skeletonized connected networks of DCX-positive neurons in (F-H).

514 (J-L) BrdU, GFAP and A $\beta$ 42 in control (L), A $\beta$ 42 (M) and A $\beta$ 42+IL4 gels (N).

515 (M) Quantification of (L-N).

516 (N) Schematics for the effects of IL4 on the AD model.

517 Scale bars: 50  $\mu$ m. All gels: 3 weeks of culture. See Supplementary Figure 2.

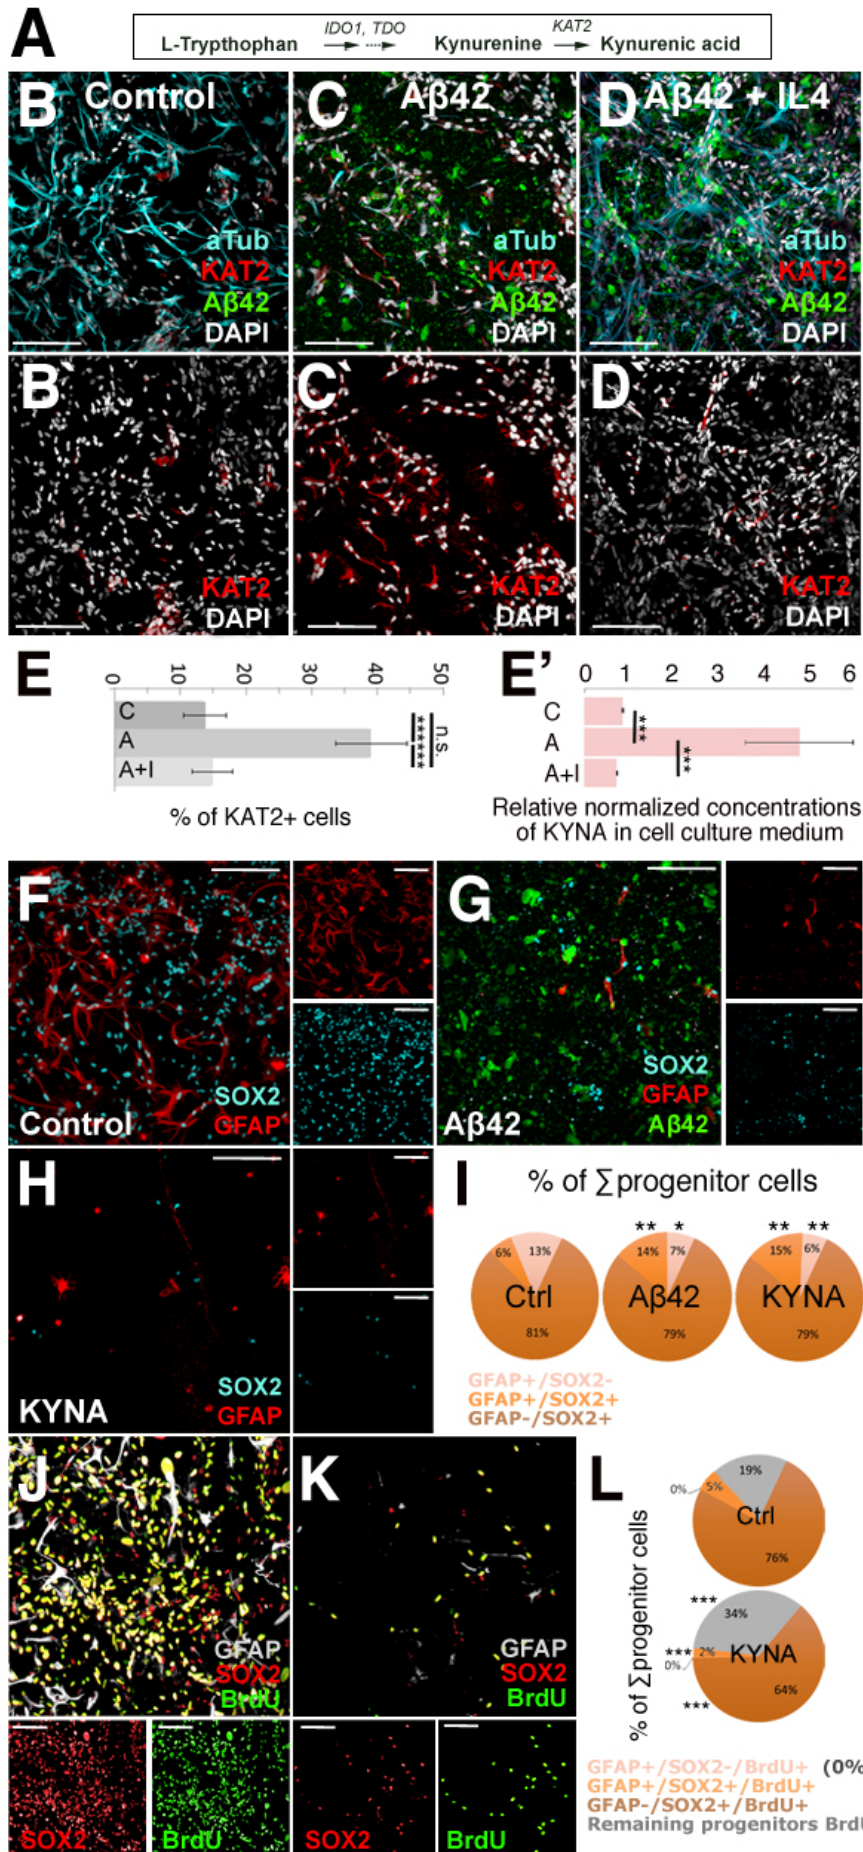

519 **Figure 3**

520 A $\beta$ 42 toxicity is mediated by Kynurenic acid production by KAT2.

521

522 (A) Tryptophan metabolism of kynurenic acid.

523 (B-D') Acetylated-tubulin, KAT2, A $\beta$ 42 in control (B), A $\beta$ 42-treated (C), and

524 A $\beta$ 42+IL-treated gels (D). KAT2 is shown alone in (B'-D').

525 (E) Quantification of the percentage of cells expressing KAT2. C: control, A:

526 A $\beta$ 42, A+i: A $\beta$ 42+IL4.

527 (E') Quantification of KAT2 levels. C: control, A: A $\beta$ 42, A+i: A $\beta$ 42+IL4.

528 (F-H) SOX2 and GFAP in control (F), A $\beta$ 42-treated (G), 10  $\mu$ M KYNA-treated

529 (H) gels. Single fluorescent channels are on the right.

530 (I) Composition of progenitors as percentage.

531 (J,K) GFAP, SOX2, and BrdU in control (J) and KYNA-treated (K) gels.

532 (L) Composition of proliferating progenitors as percentage.

533 Scale bars: 100  $\mu$ m. All gels: 3 weeks of culture. See also Supplementary

534 Figure 3 and 4.

535

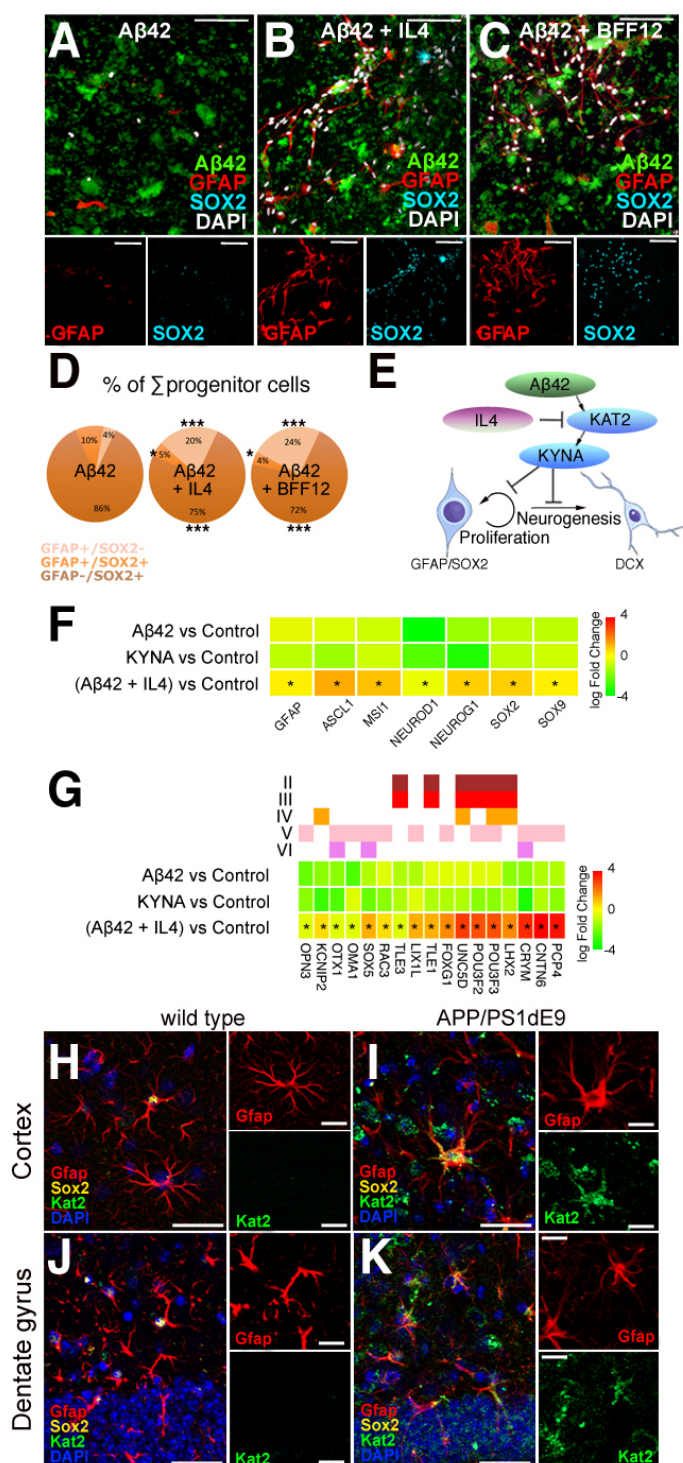

536

537 **Figure 4**

538 IL4 rescues KYN-mediated Aβ42 toxicity on primary human NSCs.

539

540 (A-C) GFAP and SOX2 in Aβ42-treated (A), Aβ42+IL4-treated (B),  
541 Aβ42+BFF12-treated gels (C). Lower panels are individual channels.

542 (D) Composition of progenitor cells as percentage.



543 (E) Schematics for the functional interaction of A $\beta$ 42, KAT2, KYNA and IL4 in  
544 regulating human NSPC plasticity and neurogenic capacity during AD.  
545 (F) Heat map for expression changes of genes related to NSC plasticity in  
546 A $\beta$ 42, KYNA, and A $\beta$ 42 + IL4 conditions.  
547 (G) Heat map for expression changes of cortical subtype marker genes in  
548 A $\beta$ 42, KYNA, and A $\beta$ 42 + IL4 conditions.  
549 (H-K) Gfap, Sox2, Kat2 in the 12-month-old control (H, J) and APP/PS1dE9 (I,  
550 K) AD model mouse in the cortex and dentate gyrus.  
551 Scale bars: 100  $\mu$ m. All gels: 3 weeks of culture. See also Supplementary  
552 Figure 4.

## 553 **Materials and Methods**

### 554 **Generation of starPEG-Heparin hydrogels and synthesis of Amyloid** 555 **peptides**

556 StarPEG-heparin hydrogels were generated as previously described (Maitz et  
557 al., 2013; Wieduwild et al., 2013) and (Papadimitriou et al., 2017). Amyloid  
558 peptides were synthesized as previously described (Bhattarai et al., 2017;  
559 Bhattarai et al., 2016; Kizil et al., 2015a; Wieduwild et al., 2013).

### 560 **Primary human neural stem cell cultures and treatments**

561 Primary neural stem cells isolated from the cerebral cortex at gestation week  
562 21 were obtained from ScienCell Research Laboratory (SRL, Catalog Number  
563 1800, Carlsbad, CA, USA) at passage one and delivered as frozen stocks.  
564 The cells are certified to be negative for HIV-1, HBV, HCV, mycoplasma,  
565 bacteria, yeast, and fungi. NSCs were seeded on conventional T75 flasks or  
566 24-well plates and cultured with Astrocyte medium (SRL, Catalog Number  
567 1801) supplemented with 2% fetal bovine serum (SRL, Catalog Number  
568 0010), 1% astrocyte growth supplement (SRL, Catalog Number 1852) and 1%  
569 penicillin/streptomycin solution (SRL, Catalog Number 0503) in an incubator  
570 with a 5% CO<sub>2</sub>/95% air atmosphere at 37 °C. BrdU was added to the culture  
571 medium at 1 week after encapsulation (10 mg/ml) for 1 day. KYNA, IL4 and  
572 BFF12 were present in the culture medium throughout the culture at the  
573 following concentrations: IL4 (10 nM), KYNA (10 μM), BFF12 (10 μM).

### 574 **Immunocytochemistry**

575 All of the hydrogels were fixed with ice-cold 4% paraformaldehyde and  
576 incubated for 1.5 hours at room temperature followed by washing in PBS  
577 overnight at 4 °C. For immunocytochemistry, the hydrogels were blocked and  
578 permeabilized in blocking solution for 4 hours at room temperature. For BrdU-  
579 treatment, the gels were incubated with 2 M HCl for 20 minutes at 37 °C  
580 followed by three washes in PBS (2 hours each). EdU staining was performed  
581 according to the manufacturer's protocol (Life Technologies, C10638) using a  
582 1 hour incubation step. The hydrogels were incubated with primary antibodies

583 (Supplementary Table 1) in blocking solution overnight at 4 °C. The gels were  
584 washed for two subsequent days at 4 °C, with occasional changes of the  
585 PBS. After washing, the gels were incubated with the secondary antibodies  
586 (1:500 in blocking solution) at room temperature for 6 hours. After 3 washing  
587 steps of 2 hours each, DAPI staining was performed (1:3000 in PBS, 2 hours  
588 at room temperature). Immunostaining for SOX2 (Santa Cruz Biotechnology,  
589 1:100), TUBB3 (R&D Systems, 1:500), GFAP (Novex, 1:500), DCX (Novex,  
590 1:300), A $\beta$ 42 (Cell Signaling Technology, host: Rabbit, 1:500), BrdU (AdB  
591 Serotec, 1:500), TDO2 (Novus Biologicals, 1:300), IDO1 (Novus Biologicals,  
592 1:300), KAT2 (Sigma, 1:300) was performed. All of the secondary antibodies  
593 were conjugated to AlexaFluor dyes (Life Technologies).

#### 594 **Fluorescent imaging**

595 For the hydrogels, fluorescent imaging was performed using a Leica SP5  
596 inverted Laser Scanning Confocal microscope. The hydrogels were placed in  
597 glass bottom Petri dishes. Sixty microliters of PBS were added on top of the  
598 hydrogels to avoid desiccation. The Z-stacks were captured using a 25x water  
599 immersion lens. Every Z-stack had a z-distance of 500  $\mu$ m. Monolayers were  
600 imaged using an inverted Zeiss Apotome 2 microscope.

#### 601 **Tandem mass spectroscopy coupled to liquid chromatography (LC- 602 MS/MS)**

603 For LC-MS/MS, the culture media in last week (Day 15-21) were collected  
604 during the medium change for untreated (control), A $\beta$ 42-treated, IL4-treated,  
605 and A $\beta$ 42+IL4-treated gels. In total, 10 ml of medium for every condition from  
606 6 gels per experimental group was collected. The quantification of Kynurenic  
607 acid (KYNA) was performed by tandem mass spectrometry (MS/MS) coupled  
608 to liquid chromatography (LC-MS/MS) using waters ACQUITY UPLC system  
609 with ACQUITY TQ Detector. The UPLC was equipped with an analytical C18  
610 column (ACQUITY UPLC  $\text{\textcircled{R}}$  BEH C18 1.7  $\mu$ m, 2.1  $\times$  50 mm). The samples  
611 with 10  $\mu$ L of the volume were injected to the column. To avoid the  
612 contamination between the samples, 3 injections of PBS was performed after  
613 each sample measurement. Water with 0.1% formic acid was used as solvent

614 A and acetonitrile with 0.1% formic acid as solvent B. The time curve for  
615 running: 0.0-1.0 min, 100 % buffer A; 1.0-4.0 min, a linear gradient running  
616 from 100 % buffer A to 100 % buffer B; 4.0 min to 5.0 min, 100 % buffer B; 5.0  
617 min to 5.5 min, a linear gradient running from 100 % buffer B to 100 % buffer  
618 A; 5.5 min to 6.0 min, 100 % buffer A. For MS/MS analysis of KYNA, the TQ  
619 detector was set in multiple reaction monitoring (MRM) to detect the parent  
620 (189.95 m/z) and the daughter (88.98 m/z), with 2770V of the capillary  
621 voltage, 32V of the cone energy, 40V of the collision energy and 0.328s of the  
622 dwell time.

### 623 **Next-generation sequencing and bioinformatics analyses**

624 Sample preparation, RNA isolation, library preparation, next-generation  
625 sequencing, data analyses are performed as described before (Papadimitriou  
626 et al., 2017).

### 627 **APP/PS1dE9 mouse model of Alzheimer's disease**

628 APP/PS1dE9 mouse brains were gifts from Gerd Kempermann.  
629 Immunohistochemistry on paraffin-embedded sections were performed as  
630 described before (van Praag et al., 1999).

### 631 **Image analysis and statistics**

632 The 3D reconstructions of hydrogel images and videos were generated using  
633 Arivis 4D software. Images from monolayers were processed using Zeiss ZEN  
634 software. The statistical analyses were performed using GraphPad Prism and  
635 two-tailed Student's t-tests. The levels of significance were \*:  $p \leq 0.05$ , \*\*:  $p \leq$   
636  $0.01$ , and \*\*\*:  $p \leq 0.001$ . In all graphs, means  $\pm$  standard deviations are  
637 shown. Skeletonized networks are constructed as described (Papadimitriou et  
638 al., 2017).

639 The effect size was calculated using G-Power, and the sample size was  
640 estimated with n-Query. The data conforms to normal distribution as  
641 determined by Pearson's chi-squared test. The variations between the  
642 samples are similar as determined by variance estimation using Microsoft  
643 Excel software. For 3D gels, 9 gels were used for quantifications (3 technical

644 replicates in every experiment, and 3 experiments as biological replicates). All  
645 experiments were replicated many times in the laboratory and results were  
646 confirmed independently (80-120 gels were qualitatively analyzed to check the  
647 consistency of the results for every individual experiment).

648 **Supplementary Information**

649

650 Supplementary Figures 1-4

651

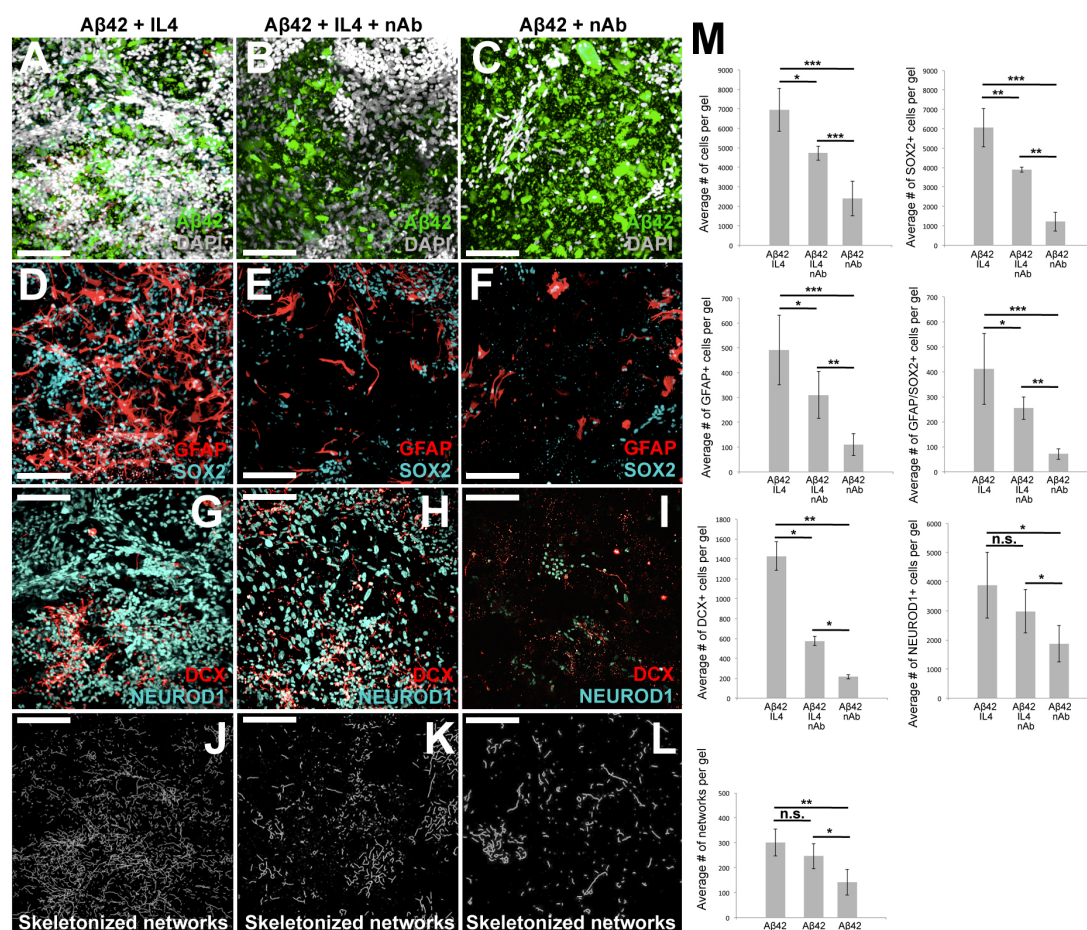

652

653 **Supplementary Figure 1**

654 The effects of IL4 on primary human NSCs are specific.

655

656 (A-C) Aβ42 and DAPI in Aβ42+IL4-treated (A), Aβ42 + IL4 + neutralizing IL4  
657 antibody (nAb)-treated (B), and Aβ42 + nAb-treated gels (C).

658 (D-F) GFAP and SOX2 in Aβ42+IL4-treated (D), Aβ42 + IL4 + nAb-treated  
659 (E), and Aβ42 + nAb-treated gels (F).

660 (G-I) DCX and NEUROD1 in Aβ42+IL4-treated (G), Aβ42 + IL4 + nAb-treated  
661 (H), and Aβ42 + nAb-treated gels (I).

662 (J-L) Skeletonized networks of connected paths in Aβ42+IL4-treated (J), Aβ42  
663 + IL4 + nAb-treated (K), and Aβ42 + nAb-treated gels (L).



664 (M) Quantifications of A-L.

665 Scale bars: 100  $\mu$ m. All gels are 3 weeks of culture. Related to Figure 1.

666

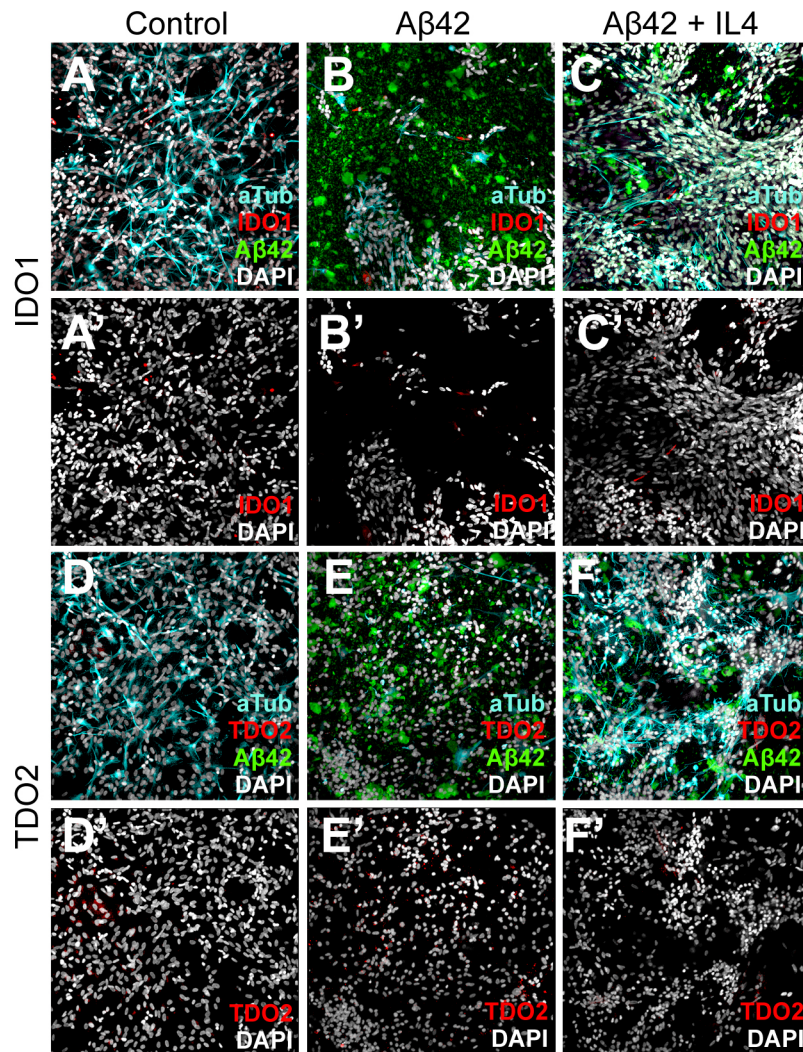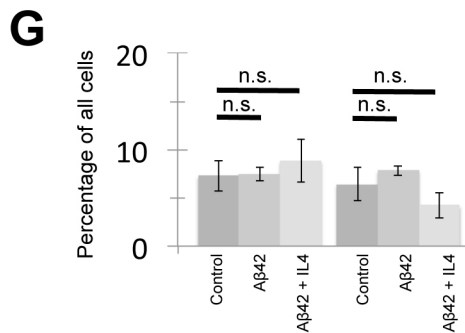

667

668 **Supplementary Figure 2**

669 Expression of TDO and IDO1.

670

671 (A-C) Acetylated tubulin, IDO1 and A $\beta$ 42 in control (A), A $\beta$ 42-treated (B),  
 672 A $\beta$ 42 + IL4-treated gels (C).  
 673 (A'-C') IDO1 and DAPI channels of A-C, respectively.  
 674 (D-F) Acetylated tubulin, TDO and A $\beta$ 42 in control (D), A $\beta$ 42-treated (E),  
 675 A $\beta$ 42 + IL4-treated gels (F).  
 676 (D'-F') TDO and DAPI channels of D-F, respectively.  
 677 (G) Quantification graph for A-F'.  
 678 Scale bars: 100  $\mu$ m. All gels are 3 weeks of culture. Related to Figure 2 and 3.  
 679  
 680  
 681

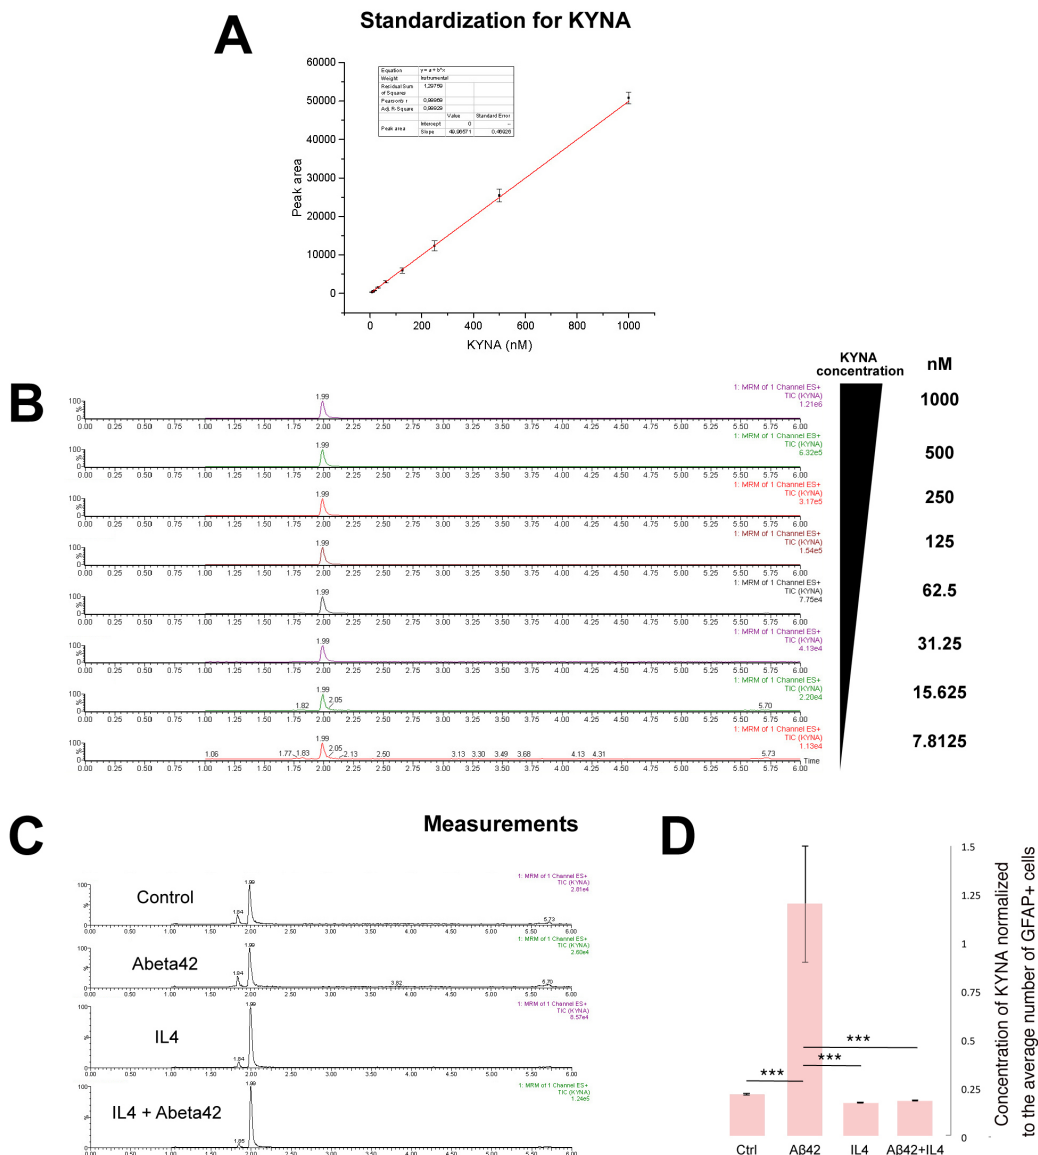

682



683 **Supplementary Figure 3**

684 Measurement of KYNA concentration.

685

686 (A) Calibration curve for various concentrations of KYNA.

687 (B) Liquid chromatography-mass spectroscopy (LC-MS/MS) running curves  
688 for different KYNA concentrations.

689 (C) LC-MS/MS running curves for untreated (control), A $\beta$ 42-treated, IL4-  
690 treated, and A $\beta$ 42+IL4-treated gels.

691 (D) Normalized quantification for the concentrations of KYNA in untreated  
692 (control), A $\beta$ 42-treated, IL4-treated, and A $\beta$ 42+IL4-treated gels.

693 All gels are 3 weeks of culture. Related to Figure 3.

694

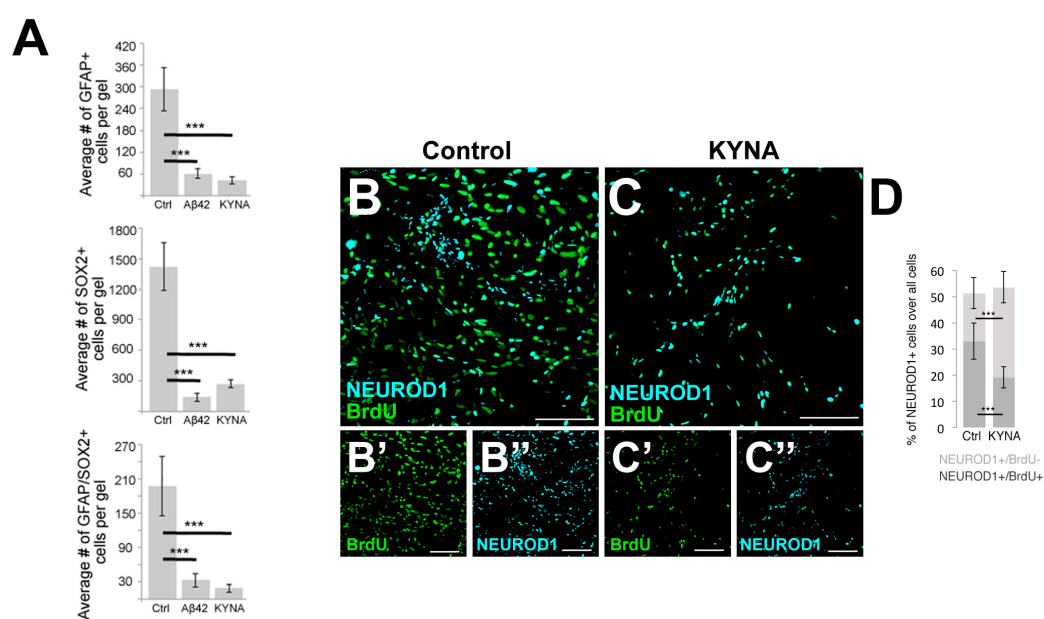

695

696 **Supplementary Figure 4**

697 Effects of A $\beta$ 42 and KYNA on the number of NSCs, and the effects of  
698 Kynurenic acid on neurogenic capacity.

699

700 (A) Quantification graphs for the number of GFAP+/SOX2-, GFAP-/SOX2+  
701 and GFAP+/SOX2+ progenitors in control, A $\beta$ 42-treated and KYNA-treated  
702 gels.

703 (B, C'') NEUROD1 and BrdU in control (B) and Kynurenic acid (KYNA)-treated  
704 gels (C). Smaller images under the panels are single fluorescent images (B',  
705 B'', C', C'').

706 (D) Quantification graph for B-C''.

707

708 Scale bars: 100  $\mu$ m. All gels are 3 weeks of culture. Related to Figure 3 and 4.
